# Supplementary material
Source: publisher figshare collection journal article supplement (https://aacr.figshare.com/articles/dataset/_/23657058)
Supplement: Supplementary file 1 [file 41513799]

**Supplemental Table S1. Summary of chimeric immune receptors designed to incorporate multiple intracellular signaling domains distributed among discrete polypeptide chains.**

| Name  | Description                                                                               | Cytotoxicity compared to second-generation CAR | Cytokine secretion compared to second-generation CAR | Additional features                                                            |
|-------|-------------------------------------------------------------------------------------------|------------------------------------------------|------------------------------------------------------|--------------------------------------------------------------------------------|
| TRuC  | scFv fused to component of $\alpha\beta$ TCR                                              | ↑                                              | ↓                                                    |                                                                                |
| AbTCR | Fab fused to $\gamma\delta$ TCR signaling domains                                         | ↑                                              | ↓                                                    |                                                                                |
| STAR  | Separate $V_H$ and $V_L$ domains on engineered murine TCR $\alpha$ and TCR $\beta$ chains | ↑                                              | ↑                                                    | Purported to have less tonic signaling, better sensitivity                     |
| TAC   | Tandem scFv pair                                                                          | --                                             | ↓                                                    |                                                                                |
| HIT   | Targeting domains inserted into <i>TRAC</i> locus                                         | ↑                                              | --                                                   | Reduces risk of aberrant genomic integrations, standardizes vector copy number |
